# Supplementary material for: Steering the Metal Precursor Location in Pd/Zeotype Catalysts and Its Implications for Catalysis
Source: MDPI journal article supplement (doi:10.3390/chemistry5010026), 2023-02-23
Supplement: s1 [file s1]

# Steering the Metal Precursor Location in Pd/Zeotype Catalysts and its Implications for Catalysis

## Supporting Materials

**Luc C.J. Smulders <sup>1</sup>, Johan H. van de Minkelis <sup>1</sup>, Johannes D. Meeldijk <sup>1</sup>, Min Tang <sup>1</sup>, Anna Liutkova <sup>2</sup>, Kang Cheng <sup>1</sup>, S. Tegan Roberts <sup>3</sup>, Glenn J. Sunley <sup>3</sup>, Emiel J.M. Hensen <sup>2</sup>, Petra E. de Jongh <sup>1</sup> and Krijn P. de Jong <sup>1,\*</sup>**

<sup>1</sup>Materials Chemistry and Catalysis, Debye Institute for Nanomaterials Science, Utrecht University, Universiteitsweg 99, 3584 CG, Utrecht, The Netherlands.

<sup>2</sup>Laboratory for Inorganic Materials and Catalysis, Department of Chemical Engineering and Chemistry, Eindhoven University of Technology, P.O. Box 513, 5600 MB, Eindhoven, The Netherlands.

<sup>3</sup>Applied Sciences, bp Innovation & Engineering, BP plc, Saltend, Hull HU12 8DS, United Kingdom

\*Correspondence: k.p.dejong@uu.nl

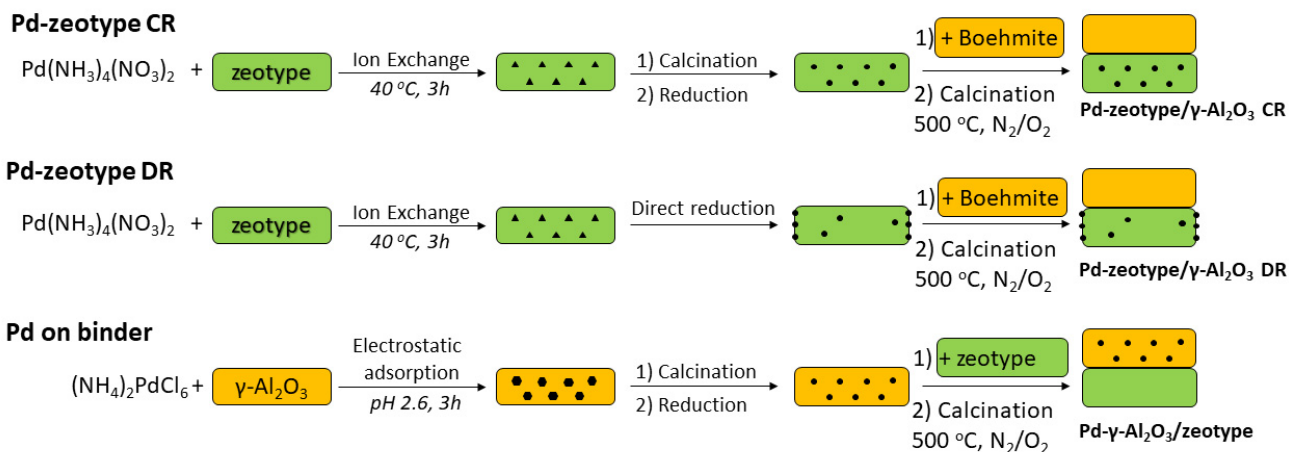

**Figure S1.** Schematic overview of catalyst synthesis.

**Table S1.** Number of acid sites as determined using  $\text{NH}_3$ -TPD and FT-IR using pyridine (Py) as probe molecule.

| Material                                      | $\text{NH}_3$ -TPD<br>(mmol/g) |               |       | Py-FT-IR<br>(mmol/g) |       |
|-----------------------------------------------|--------------------------------|---------------|-------|----------------------|-------|
|                                               | Weak                           | Medium/Strong | Total | BAS                  | LAS   |
| SAPO-11                                       | 0.17                           | 0.22          | 0.40  | 0.082                | 0.021 |
| ZSM-22                                        | 0.20                           | 0.28          | 0.48  | 0.081                | 0.016 |
| $\gamma\text{-Al}_2\text{O}_3$                | -                              | -             | 0.46  | 0                    | 0.226 |
| SAPO-11/ $\gamma\text{-Al}_2\text{O}_3$       | 0.08                           | 0.27          | 0.35  | 0.020                | 0.096 |
| ZSM-22/ $\gamma\text{-Al}_2\text{O}_3$        | 0.14                           | 0.35          | 0.49  | 0.025                | 0.086 |
| Pd- $\gamma\text{-Al}_2\text{O}_3$ /SAPO-11   | 0.08                           | 0.29          | 0.37  | 0.015                | 0.112 |
| Pd-SAPO-11/ $\gamma\text{-Al}_2\text{O}_3$ DR | 0.08                           | 0.26          | 0.34  | n.d.                 | n.d.  |
| Pd-SAPO-11/ $\gamma\text{-Al}_2\text{O}_3$ CR | 0.07                           | 0.25          | 0.32  | 0.018                | 0.117 |
| Pd- $\gamma\text{-Al}_2\text{O}_3$ /ZSM-22    | 0.17                           | 0.37          | 0.53  | 0.023                | 0.149 |
| Pd-ZSM-22/ $\gamma\text{-Al}_2\text{O}_3$ DR  | 0.14                           | 0.35          | 0.49  | n.d.                 | n.d.  |
| Pd-ZSM-22/ $\gamma\text{-Al}_2\text{O}_3$ CR  | 0.15                           | 0.33          | 0.48  | 0.019                | 0.108 |

**Table S2.** Palladium loading, palladium nanoparticle properties and acid properties of each catalyst.

| Catalyst                                                | Pd weight loading <sup>a</sup><br>(wt%) | Pd size, $d_{Pd}$<br>(nm) | D <sup>c</sup> | $n_{Pd}^d$ | $n_a^e$ | $n_{Pd}/n_a$ |
|---------------------------------------------------------|-----------------------------------------|---------------------------|----------------|------------|---------|--------------|
| Pd- $\gamma$ -Al <sub>2</sub> O <sub>3</sub> /SAPO-11   | 0.49                                    | 2.0 ± 0.4                 | 56             | 0.026      | 0.29    | 0.088        |
| Pd-SAPO-11/ $\gamma$ -Al <sub>2</sub> O <sub>3</sub> DR | 0.45                                    | 2.3 ± 0.9                 | 48             | 0.020      | 0.26    | 0.079        |
| Pd-SAPO-11/ $\gamma$ -Al <sub>2</sub> O <sub>3</sub> CR | 0.41                                    | 1.7 ± 0.4                 | 65             | 0.025      | 0.25    | 0.101        |
| Pd- $\gamma$ -Al <sub>2</sub> O <sub>3</sub> /ZSM-22    | 0.50                                    | 2.0 ± 0.4                 | 56             | 0.024      | 0.37    | 0.064        |
| Pd-ZSM-22/ $\gamma$ -Al <sub>2</sub> O <sub>3</sub> DR  | 0.44                                    | 1.9 ± 0.4                 | 59             | 0.024      | 0.35    | 0.069        |
| Pd-ZSM-22/ $\gamma$ -Al <sub>2</sub> O <sub>3</sub> CR  | 0.41                                    | 2.1 ± 0.4                 | 53             | 0.020      | 0.33    | 0.062        |

<sup>a</sup>By inductively coupled plasma optical emission spectroscopy on digested samples.

<sup>b</sup>Number average particle size by measurement Pd nanoparticle diameter of at least 400 particles in STEM images.

<sup>c</sup>Dispersion of Pd nanoparticles using Dispersion =  $1.112/d_{Pd}$

<sup>d</sup>Calculated based on the ICP weight loading of Pd and the dispersion.

<sup>e</sup>By deconvolution of NH<sub>3</sub>-TPD profiles and integration of the peak at higher temperatures ( $T \geq 200$  °C for SAPO-11 and  $T \geq 300$  °C for ZSM-22).

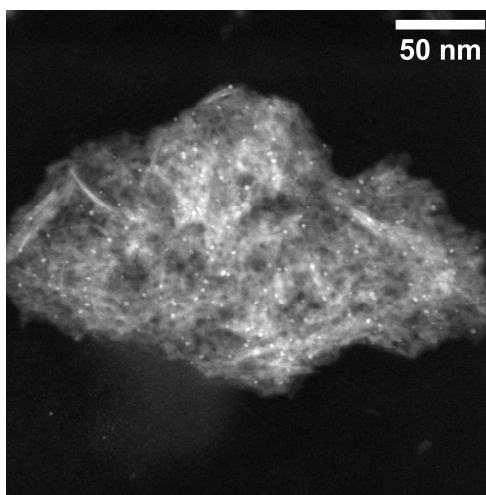

**Figure S2.** HAADF-STEM image of Pd/ $\gamma$ -Al<sub>2</sub>O<sub>3</sub> before mixing with a zeotype material.

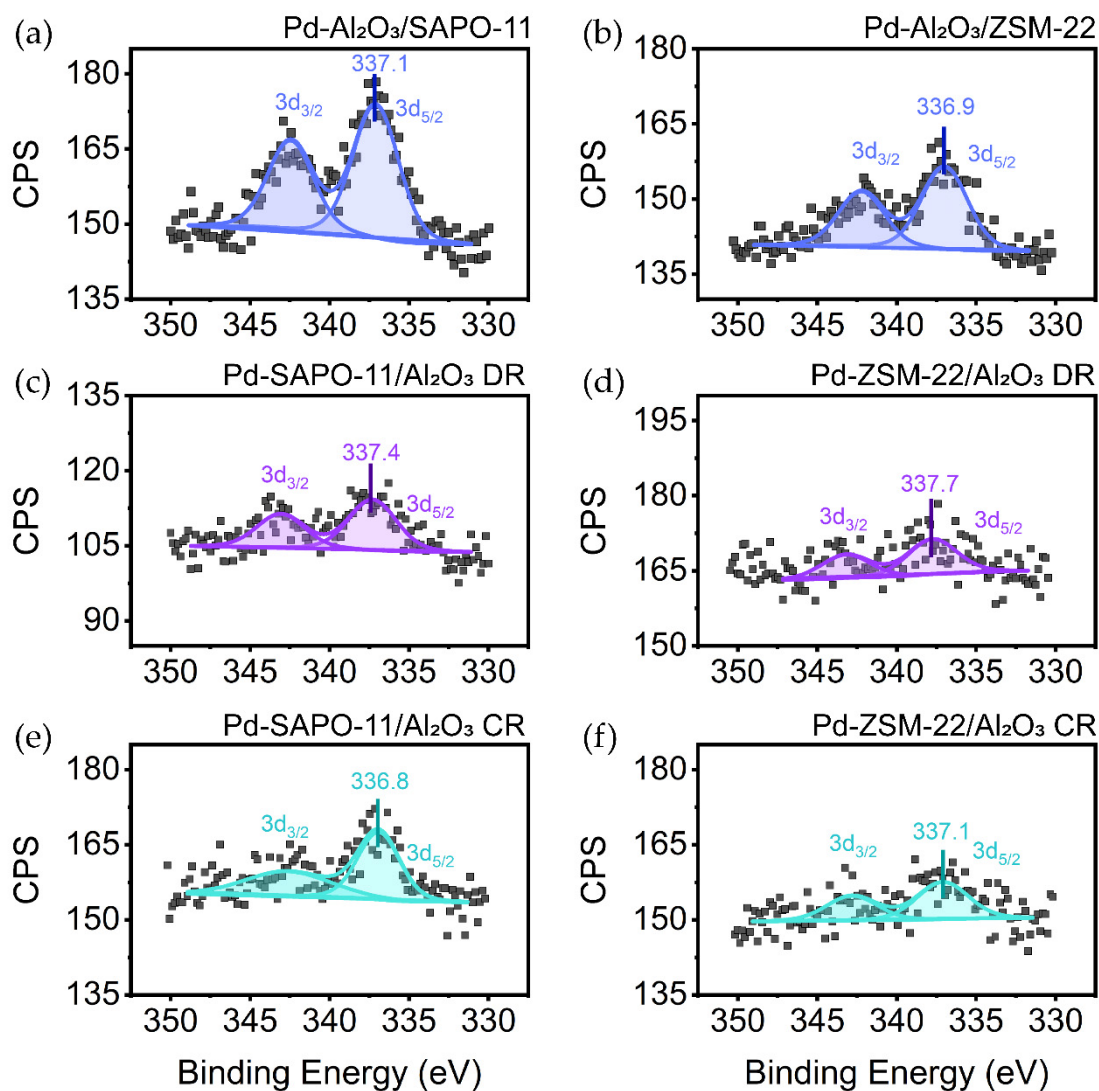

**Figure S3.** XPS spectra of Pd in all catalysts.

**Table S3.** Results of N<sub>2</sub> physisorption on samples without  $\gamma$ -alumina.

| Sample           | S <sub>BET</sub><br>(m <sup>2</sup> /g) | S <sub>micro</sub><br>(m <sup>2</sup> /g) | S <sub>ext</sub><br>(m <sup>2</sup> /g) | V <sub>total</sub><br>(cm <sup>3</sup> /g) | V <sub>micro</sub><br>(cm <sup>3</sup> /g) | S <sub>micro</sub><br>(m <sup>2</sup> /g) | S <sub>Langmuir</sub><br>(m <sup>2</sup> /g) |
|------------------|-----------------------------------------|-------------------------------------------|-----------------------------------------|--------------------------------------------|--------------------------------------------|-------------------------------------------|----------------------------------------------|
| Dubinin-Astakhov |                                         |                                           |                                         |                                            |                                            |                                           |                                              |
| SAPO-11          | 134                                     | 56                                        | 78                                      | 0.17                                       | 0.024                                      | 119                                       | 147                                          |
| 0.5Pd-SAPO-11 CR | 122                                     | 58                                        | 64                                      | 0.16                                       | 0.024                                      | 108                                       | 129                                          |
| 1Pd-SAPO-11 DR   | 131                                     | 68                                        | 64                                      | 0.16                                       | 0.028                                      | 125                                       | 142                                          |
| ZSM-22           | 126                                     | 70                                        | 56                                      | 0.19                                       | 0.029                                      | 170                                       | 136                                          |
| 0.5Pd-ZSM-22 CR  | 138                                     | 83                                        | 55                                      | 0.32                                       | 0.033                                      | 132                                       | 144                                          |
| 0.9Pd-ZSM-22 DR  | 174                                     | 93                                        | 83                                      | 0.22                                       | 0.040                                      | 170                                       | 194                                          |

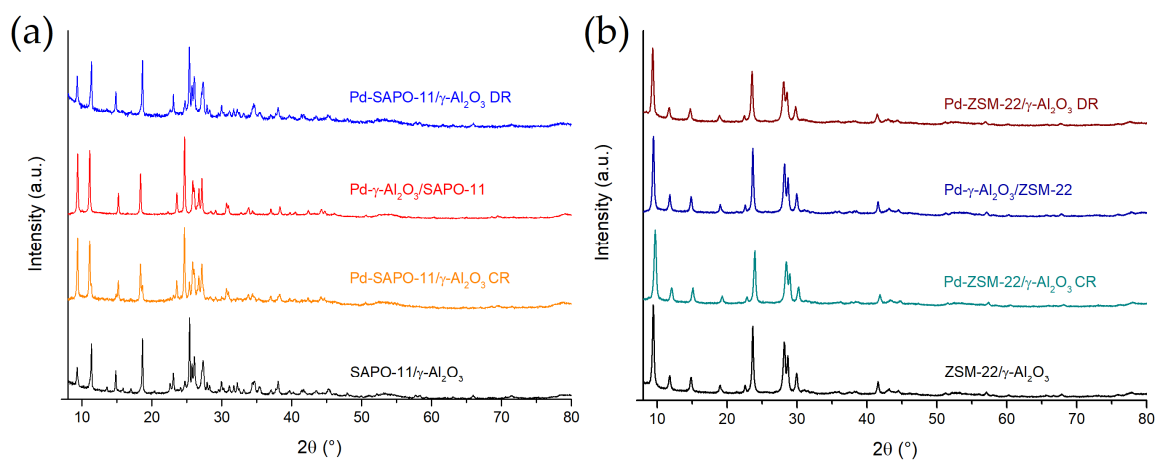

**Figure S4.** XRD patterns of (a) SAPO-11 based catalysts and (b) ZSM-22 based catalysts each catalyst and zeotype/alumina composite materials.

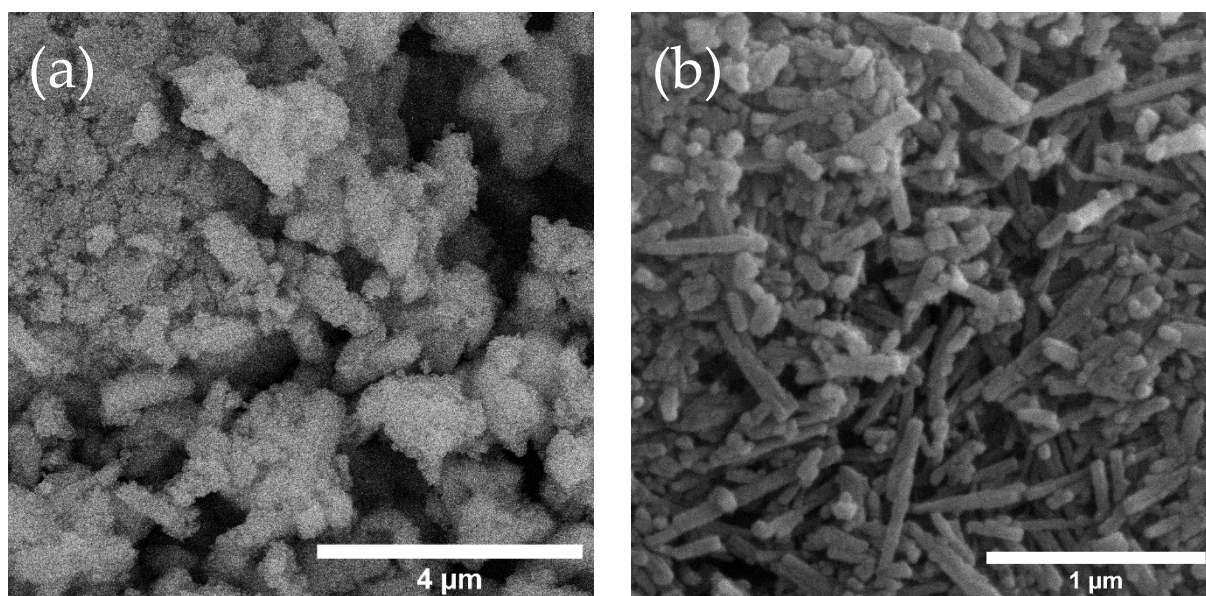

**Figure S5.** SEM images of as-received (a) SAPO-11 and (b) ZSM-22. As can be seen in (a) the SAPO-11 sample contains both the typical cuboid SAPO-11 crystals, as well as a less crystalline component (top right). In (b) the needle-like shape of ZSM-22 is evident.

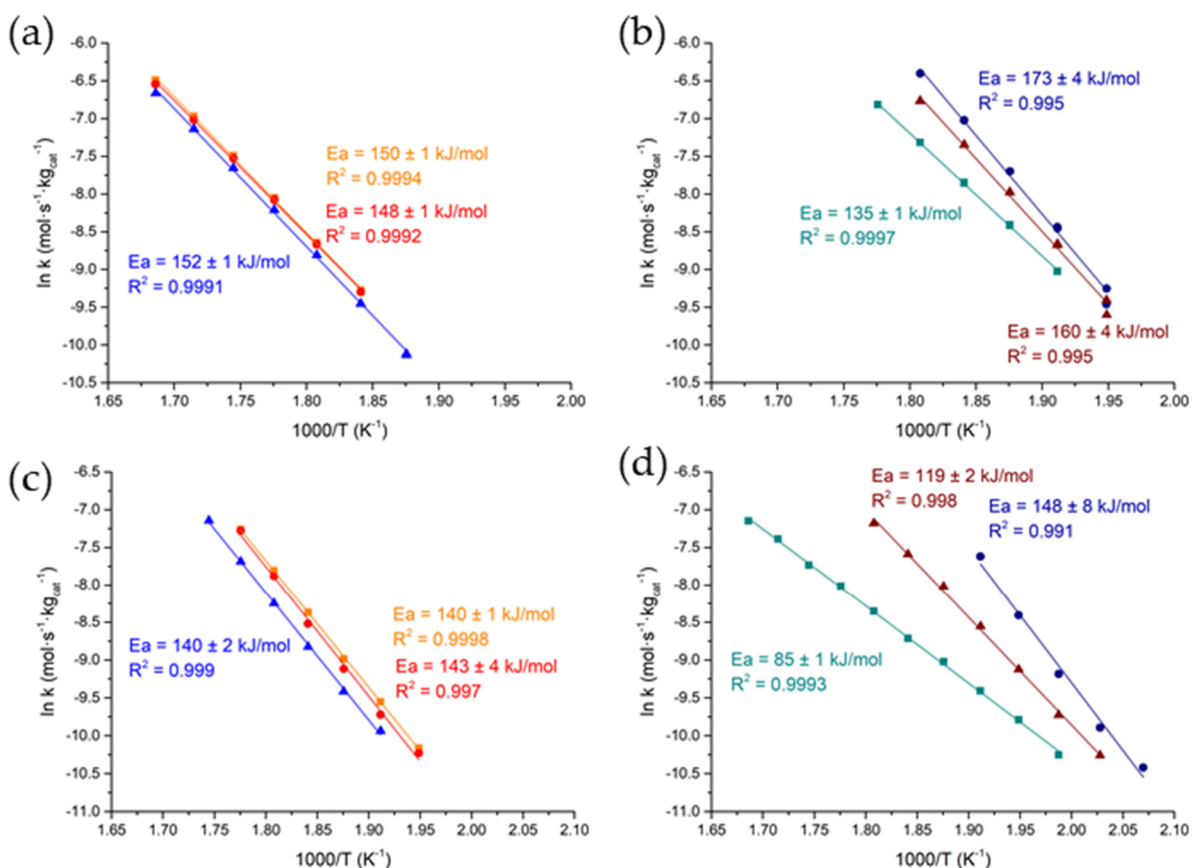

**Figure S6.** Arrhenius plots of (a) *n*-heptane conversion over SAPO-11 based catalysts, (b) *n*-heptane conversion over ZSM-22 based catalysts, (c) *n*-hexadecane conversion over SAPO-11 based catalysts and (d) *n*-hexadecane conversion over ZSM-22 based catalysts. The catalysts are depicted as follows: Pd-SAPO-11/ $\gamma$ -Al<sub>2</sub>O<sub>3</sub> (CR) (orange squares), Pd- $\gamma$ -Al<sub>2</sub>O<sub>3</sub>/SAPO-11 (red circles), Pd-SAPO-11/ $\gamma$ -Al<sub>2</sub>O<sub>3</sub> (DR) (blue triangles), Pd-ZSM-22/ $\gamma$ -Al<sub>2</sub>O<sub>3</sub> (CR) (dark cyan squares), Pd- $\gamma$ -Al<sub>2</sub>O<sub>3</sub>/ZSM-22 (dark blue circles) and Pd-ZSM-22/ $\gamma$ -Al<sub>2</sub>O<sub>3</sub> (DR) (brown triangles). The plots are based on measurements below 20 % conversion. Reaction conditions of *n*-heptane conversion: P = 10 bar, H<sub>2</sub>/*n*-heptane = 10 : 1 (mol/mol), WHSV = 2.4 g<sub>*n*-C<sub>7</sub></sub> · g<sub>cat</sub><sup>-1</sup> · h<sup>-1</sup>. Reaction conditions of *n*-hexadecane conversion: P = 5 bar, H<sub>2</sub>/*n*-heptane = 10 : 1 (mol/mol), WHSV = 2.9 g<sub>*n*-C<sub>16</sub></sub> · g<sub>cat</sub><sup>-1</sup> · h<sup>-1</sup>.
